# Supplementary material
Source: MDPI journal article supplement (https://www.mdpi.com/1424-8247/16/6/829)
Supplement: s1 [file s1]

## SUPPLEMENTARY MATERIALS

### In Silico Development of Novel Benzofuran-1,3,4-Oxadiazoles Lead Inhibitors of M. tuberculosis Polyketide Synthase<sup>13</sup> Enzyme

Ali Irfan<sup>1</sup>, Shah Faisal <sup>2</sup>, Ameer Fawad Zahoor <sup>1,\*</sup>, Razia Noreen <sup>3</sup>, Sami A. Al-Hussain <sup>4,\*</sup>, Burak Tuzun <sup>5</sup>, Rakshanda Javaid <sup>1</sup>, Ahmed A. Elhenawy <sup>6,7</sup>, Magdi E. A. Zaki <sup>4</sup>, Sajjad Ahmad<sup>8</sup> and Magda H. Abdellattif <sup>9</sup>

- <sup>1</sup> Department of Chemistry, Government College University Faisalabad, Faisalabad 38000, Pakistan; raialiirfan@gmail.com; fawad.zahoor@gcuf.edu.pk; rakshanda880@gmail.com
- <sup>2</sup> Department of Chemistry, Islamia College University Peshawar, Peshawar 25120, Pakistan; faisalybs@gmail.com
- <sup>3</sup> Department of Biochemistry, Government College University Faisalabad, Faisalabad 38000, Pakistan; razianoreen@hotmail.com
- <sup>4</sup> Department of Chemistry, College of Science, Imam Mohammad Ibn Saud Islamic University (IMSIU), Riyadh 13623, Saudi Arabia; sahussain@imamu.edu.sa; mezaki@imamu.edu.sa
- <sup>5</sup> Plant and animal production department, Technical Sciences Vocational School of Sivas, Sivas Cumhuriyet University, Sivas-58140, Turkey; theburaktuzun@yahoo.com
- <sup>6</sup> Chemistry Department, Faculty of Science, Al-Azhar University, Nasr City, Cairo 11884, Egypt
- <sup>7</sup> Chemistry Department, Faculty of Science and Art, AlBaha University, Mukhwah, Al Bahah 65731, Saudi Arabia; elhenawy\_sci@hotmail.com (AAE.)
- <sup>8</sup> Department of Health and Biological Sciences, Abasyn University, Peshawar 25000, Pakistan; [sajjad.ahmad@abasyn.edu.pk](mailto:sajjad.ahmad@abasyn.edu.pk) (S.J)
- <sup>9</sup> Department of Chemistry, College of Science, Taif University, PO Box 11099, Taif 21944, Saudi Arabia; M.hasan@tu.edu.sa
- \* Correspondence: Correspondence: fawad.zahoor@gcuf.edu.pk; (A.F.Z.); Tel.: +923336729186; sahussain@imamu.edu.sa (S.A.Al-H)

### Table of contents

| Entry | Name of Table                                                                                            | Page No. |
|-------|----------------------------------------------------------------------------------------------------------|----------|
| S1    | The binding affinities of benzofuran-1,3,4-oxadiazoles <b>BF10-BF16</b>                                  | 2        |
| S2    | ADMET profiles of the synthesized benzofuran-1,3,4-oxadiazoles <b>BF10-16 and TAM-16</b>                 | 3        |
| S3    | Drug-likeness and Medicinal chemistry profiles of benzofuran-1,3,4-oxadiazoles <b>BF10-16 and TAM-16</b> | 4        |

**Table S1:** The binding affinities of benzofuran-1,3,4-oxadiazoles **BF10-BF16** with the Mtb Pks13 enzyme.

| Benzofuran-1,3,4-oxadiazoles | Binding Affinities with Pks13 |
|------------------------------|-------------------------------|
| <b>BF10</b>                  | -11.49 kcal/mol               |
| <b>BF11</b>                  | -10.94 kcal/mol               |
| <b>BF12</b>                  | -11.10 kcal/mol               |
| <b>BF13</b>                  | -10.90 kcal/mol               |
| <b>BF14</b>                  | -12.01 kcal/mol               |
| <b>BF15</b>                  | -11.08 kcal/mol               |
| <b>BF16</b>                  | -12.39 kcal/mol               |
| <b>TAM-16</b>                | -14.61 kcal/mol               |

**Table S2:** ADMET profiles of the synthesized benzofuran-1,3,4-oxadiazoles **BF10-16** and **TAM-16**

| Compounds                | Carcinogenicity | HIA+ Values | Lipophilicity (iLogP) | CYP450 3A4 Inhibitor/Substrate | Log S (ESOL) H <sub>2</sub> O Solubility | P-gp Substrate | Renal OCTs    |
|--------------------------|-----------------|-------------|-----------------------|--------------------------------|------------------------------------------|----------------|---------------|
| <b>BF10</b>              | None            | 1.00        | 2.73                  | Substrate                      | -5.52 Moderately Soluble                 | No             | Non-inhibitor |
| <b>BF11</b>              | None            | 1.00        | 2.79                  | Substrate                      | -3.29 Soluble                            | No             | Non-inhibitor |
| <b>BF12</b>              | None            | 1.00        | 3.28                  | Substrate                      | -5.07 Moderately Soluble                 | No             | Non-inhibitor |
| <b>BF13</b>              | None            | 1.00        | 3.54                  | Substrate                      | -4.54 Moderately Soluble                 | No             | Non-inhibitor |
| <b>BF14</b>              | None            | 1.00        | 3.68                  | Substrate                      | -4.77 Moderately Soluble                 | No             | Non-inhibitor |
| <b>BF15</b>              | None            | 1.00        | 3.57                  | Substrate                      | -5.07 Moderately Soluble                 | No             | Non-inhibitor |
| <b>BF16</b>              | None            | 1.00        | 3.48                  | Substrate                      | -3.75 Soluble                            | No             | Non-inhibitor |
| <b>TAM-16 (Standard)</b> | None            | 0.993       | 2.48                  | Substrate                      | -3.72 Moderately Soluble                 | Yes            | Non-inhibitor |

**Table S3.** Drug-likeness and Medicinal chemistry profiles of benzofuran-1,3,4-oxadiazoles **BF10-16** and **TAM-16**

| Compounds     | Bioavailability Score | PAINS Alerts | Accept<br>Lipinski's Rule<br>Yes/No | Pfizer Rule | Golden<br>Triangle Rule | TPSA                  |
|---------------|-----------------------|--------------|-------------------------------------|-------------|-------------------------|-----------------------|
| <b>BF10</b>   | 0.55                  | None         | Yes                                 | complied    | Accepted                | 106.46 Å <sup>2</sup> |
| <b>BF11</b>   | 0.55                  | None         | Yes                                 | complied    | Accepted                | 118.93 Å <sup>2</sup> |
| <b>BF12</b>   | 0.55                  | None         | Yes                                 | complied    | Accepted                | 106.46 Å <sup>2</sup> |
| <b>BF13</b>   | 0.55                  | None         | Yes                                 | complied    | Accepted                | 115.69 Å <sup>2</sup> |
| <b>BF14</b>   | 0.55                  | None         | Yes                                 | complied    | Accepted                | 115.69 Å <sup>2</sup> |
| <b>BF15</b>   | 0.55                  | None         | Yes                                 | complied    | Accepted                | 106.46 Å <sup>2</sup> |
| <b>BF16</b>   | 0.55                  | None         | Yes                                 | complied    | Accepted                | 97.67 Å <sup>2</sup>  |
| <b>TAM-16</b> | 0.55                  | 1-alert      | Yes                                 | complied    | Accepted                | 85.94 Å <sup>2</sup>  |
